# Supplementary material for: Matrine Impairs Platelet Function and Thrombosis and Inhibits ROS Production
Source: Front Pharmacol. 2021 Jul 22;12:717725. doi: 10.3389/fphar.2021.717725 (PMC8339414; doi:10.3389/fphar.2021.717725)
Supplement: Supplementary file 1 [file DataSheet1.ZIP]

Archive with 203 entries (167 files):
- Raw data (3)/
- Raw data (3)/Raw data/
- Raw data (3)/Raw data/Flow chamber original images/
- Raw data (3)/Raw data/Flow chamber original images/1 min-0-0.25.tif
- Raw data (3)/Raw data/Flow chamber original images/1 min-0.5-1.tif
- Raw data (3)/Raw data/Flow chamber original images/3 min-0-0.25.tif
- Raw data (3)/Raw data/Flow chamber original images/3 min-0.5-1.tif
- Raw data (3)/Raw data/Flow chamber original images/5 min-0-0.25.tif
- Raw data (3)/Raw data/Flow chamber original images/5 min-0.5-1.tif
- Raw data (3)/Raw data/Original Flow files/
- Raw data (3)/Raw data/Original Flow files/CD41a/
- Raw data (3)/Raw data/Original Flow files/CD41a/1/
- Raw data (3)/Raw data/Original Flow files/CD41a/1/Specimen_001_210205  0mgml_001.fcs
- Raw data (3)/Raw data/Original Flow files/CD41a/1/Specimen_001_210205 025mgml_002.fcs
- Raw data (3)/Raw data/Original Flow files/CD41a/1/Specimen_001_210205 05mgml_003.fcs
- Raw data (3)/Raw data/Original Flow files/CD41a/2/
- Raw data (3)/Raw data/Original Flow files/CD41a/2/Specimen_001_210207  025mgml_002.fcs
- Raw data (3)/Raw data/Original Flow files/CD41a/2/Specimen_001_210207  05mgml_003.fcs
- Raw data (3)/Raw data/Original Flow files/CD41a/2/Specimen_001_210207  0mgml_001.fcs
- Raw data (3)/Raw data/Original Flow files/CD41a/2/Specimen_001_210207  1mgml_004.fcs
- Raw data (3)/Raw data/Original Flow files/CD41a/3/
- Raw data (3)/Raw data/Original Flow files/CD41a/3/Specimen_001_210303 025mg ml_002.fcs
- Raw data (3)/Raw data/Original Flow files/CD41a/3/Specimen_001_210303 05mg ml_003.fcs
- Raw data (3)/Raw data/Original Flow files/CD41a/3/Specimen_001_210303 0mg ml_001.fcs
- Raw data (3)/Raw data/Original Flow files/CD41a/3/Specimen_001_210303 1mg ml_004.fcs
- Raw data (3)/Raw data/Original Flow files/CD41a/4/
- Raw data (3)/Raw data/Original Flow files/CD41a/4/Specimen_001_210308 025mg ml_002.fcs
- Raw data (3)/Raw data/Original Flow files/CD41a/4/Specimen_001_210308 05mg ml_003.fcs
- Raw data (3)/Raw data/Original Flow files/CD41a/4/Specimen_001_210308 0mg ml_001.fcs
- Raw data (3)/Raw data/Original Flow files/CD41a/4/Specimen_001_210308 1mg ml_004.fcs
- Raw data (3)/Raw data/Original Flow files/CD41a/5/
- Raw data (3)/Raw data/Original Flow files/CD41a/5/Specimen_001_210309 025mg ml_002.fcs
- Raw data (3)/Raw data/Original Flow files/CD41a/5/Specimen_001_210309 05mg ml_003.fcs
- Raw data (3)/Raw data/Original Flow files/CD41a/5/Specimen_001_210309 0mg ml_001.fcs
- Raw data (3)/Raw data/Original Flow files/CD41a/5/Specimen_001_210309 1mg ml_004.fcs
- Raw data (3)/Raw data/Original Flow files/CD41a/6/
- Raw data (3)/Raw data/Original Flow files/CD41a/6/Specimen_001_210311 025mg ml_002.fcs
- Raw data (3)/Raw data/Original Flow files/CD41a/6/Specimen_001_210311 05mg ml_003.fcs
- Raw data (3)/Raw data/Original Flow files/CD41a/6/Specimen_001_210311 0mg ml_001.fcs
- Raw data (3)/Raw data/Original Flow files/CD41a/6/Specimen_001_210311 1mg ml_004.fcs
- Raw data (3)/Raw data/Original Flow files/CD41a/7/
- Raw data (3)/Raw data/Original Flow files/CD41a/7/Specimen_001_210415  025mg ml_002.fcs
- Raw data (3)/Raw data/Original Flow files/CD41a/7/Specimen_001_210415  05mg ml_003.fcs
- Raw data (3)/Raw data/Original Flow files/CD41a/7/Specimen_001_210415  0mg ml_001.fcs
- Raw data (3)/Raw data/Original Flow files/CD41a/7/Specimen_001_210415  1mgml_004.fcs
- Raw data (3)/Raw data/Original Flow files/CD42b/
- Raw data (3)/Raw data/Original Flow files/CD42b/1/
- Raw data (3)/Raw data/Original Flow files/CD42b/1/Specimen_001_211022  025mgml_002.fcs
- Raw data (3)/Raw data/Original Flow files/CD42b/1/Specimen_001_211022  05mgml_003.fcs
- Raw data (3)/Raw data/Original Flow files/CD42b/1/Specimen_001_211022  0mgml_001.fcs
- Raw data (3)/Raw data/Original Flow files/CD42b/1/Specimen_001_211022 1mgml_004.fcs
- Raw data (3)/Raw data/Original Flow files/CD42b/2/
- Raw data (3)/Raw data/Original Flow files/CD42b/2/Specimen_001_210205 025mgml_002.fcs
- Raw data (3)/Raw data/Original Flow files/CD42b/2/Specimen_001_210205 05mgml_003.fcs
- Raw data (3)/Raw data/Original Flow files/CD42b/2/Specimen_001_210205 0mgml_001.fcs
- Raw data (3)/Raw data/Original Flow files/CD42b/2/Specimen_001_210205 1mgml_004.fcs
- Raw data (3)/Raw data/Original Flow files/CD42b/3/
- Raw data (3)/Raw data/Original Flow files/CD42b/3/Specimen_001_210207  025mgml_002.fcs
- Raw data (3)/Raw data/Original Flow files/CD42b/3/Specimen_001_210207  05mgml_003.fcs
- Raw data (3)/Raw data/Original Flow files/CD42b/3/Specimen_001_210207  0mgml_001.fcs
- Raw data (3)/Raw data/Original Flow files/CD42b/3/Specimen_001_210207  1mgml_004.fcs
- Raw data (3)/Raw data/Original Flow files/CD42b/4/
- Raw data (3)/Raw data/Original Flow files/CD42b/4/Specimen_001_210303 025mg ml_002.fcs
- Raw data (3)/Raw data/Original Flow files/CD42b/4/Specimen_001_210303 05mg ml_003.fcs
- Raw data (3)/Raw data/Original Flow files/CD42b/4/Specimen_001_210303 0mg ml_001.fcs
- Raw data (3)/Raw data/Original Flow files/CD42b/4/Specimen_001_210303 1mg ml_004.fcs
- Raw data (3)/Raw data/Original Flow files/CD42b/5/
- Raw data (3)/Raw data/Original Flow files/CD42b/5/Specimen_001_210308 025mgml_002.fcs
- Raw data (3)/Raw data/Original Flow files/CD42b/5/Specimen_001_210308 05mgml_003.fcs
- Raw data (3)/Raw data/Original Flow files/CD42b/5/Specimen_001_210308 0mgml_001.fcs
- Raw data (3)/Raw data/Original Flow files/CD42b/5/Specimen_001_210308 1mgml_004.fcs
- Raw data (3)/Raw data/Original Flow files/CD42b/6/
- Raw data (3)/Raw data/Original Flow files/CD42b/6/Specimen_001_210311   025mgml_002.fcs
- Raw data (3)/Raw data/Original Flow files/CD42b/6/Specimen_001_210311   05mgml_003.fcs
- Raw data (3)/Raw data/Original Flow files/CD42b/6/Specimen_001_210311   0mgml_001.fcs
- Raw data (3)/Raw data/Original Flow files/CD42b/6/Specimen_001_210311   1mgml_004.fcs
- Raw data (3)/Raw data/Original Flow files/CD42b/7/
- Raw data (3)/Raw data/Original Flow files/CD42b/7/Specimen_001_210415 025mgml_002.fcs
- Raw data (3)/Raw data/Original Flow files/CD42b/7/Specimen_001_210415 05mgml_003.fcs
- Raw data (3)/Raw data/Original Flow files/CD42b/7/Specimen_001_210415 0mgml_001.fcs
- Raw data (3)/Raw data/Original Flow files/CD42b/7/Specimen_001_210415 1mgml_004.fcs
- Raw data (3)/Raw data/Original Flow files/CD62P/
- Raw data (3)/Raw data/Original Flow files/CD62P/1/
- Raw data (3)/Raw data/Original Flow files/CD62P/1/Specimen_001_CRP  0mgml_001.fcs
- Raw data (3)/Raw data/Original Flow files/CD62P/1/Specimen_001_CRP 025mgml_002.fcs
- Raw data (3)/Raw data/Original Flow files/CD62P/1/Specimen_001_CRP 05mgml_003.fcs
- Raw data (3)/Raw data/Original Flow files/CD62P/1/Specimen_001_CRP 1mgml_004.fcs
- Raw data (3)/Raw data/Original Flow files/CD62P/1/Specimen_001_Resting 025mgml_002.fcs
- Raw data (3)/Raw data/Original Flow files/CD62P/1/Specimen_001_Resting 05mgml_003.fcs
- Raw data (3)/Raw data/Original Flow files/CD62P/1/Specimen_001_Resting 0mgml_001.fcs
- Raw data (3)/Raw data/Original Flow files/CD62P/1/Specimen_001_Resting 1mgml_004.fcs
- Raw data (3)/Raw data/Original Flow files/CD62P/1/Specimen_001_Thr 025mgml_002.fcs
- Raw data (3)/Raw data/Original Flow files/CD62P/1/Specimen_001_Thr 05mgml_003.fcs
- Raw data (3)/Raw data/Original Flow files/CD62P/1/Specimen_001_Thr 0mgml_001.fcs
- Raw data (3)/Raw data/Original Flow files/CD62P/1/Specimen_001_Thr 1mgml_004.fcs
- Raw data (3)/Raw data/Original Flow files/CD62P/2/
- Raw data (3)/Raw data/Original Flow files/CD62P/2/Specimen_001_CRP    05mgml_003.fcs
- Raw data (3)/Raw data/Original Flow files/CD62P/2/Specimen_001_CRP   025mgml_002.fcs
- Raw data (3)/Raw data/Original Flow files/CD62P/2/Specimen_001_CRP   0mgml_001.fcs
- Raw data (3)/Raw data/Original Flow files/CD62P/2/Specimen_001_CRP   1mgml_004.fcs
- Raw data (3)/Raw data/Original Flow files/CD62P/2/Specimen_001_Resting   025mgml_002.fcs
- Raw data (3)/Raw data/Original Flow files/CD62P/2/Specimen_001_Resting   0mgml_001.fcs
- Raw data (3)/Raw data/Original Flow files/CD62P/2/Specimen_001_Resting   1mgml_004.fcs
- Raw data (3)/Raw data/Original Flow files/CD62P/2/Specimen_001_Restinh   05mgml_003.fcs
- Raw data (3)/Raw data/Original Flow files/CD62P/2/Specimen_001_Thr   025mgml_002.fcs
- Raw data (3)/Raw data/Original Flow files/CD62P/2/Specimen_001_Thr   05mgml_003.fcs
- Raw data (3)/Raw data/Original Flow files/CD62P/2/Specimen_001_Thr   0mgml_001.fcs
- Raw data (3)/Raw data/Original Flow files/CD62P/2/Specimen_001_Thr   1mgml_004.fcs
- Raw data (3)/Raw data/Original Flow files/CD62P/3/
- Raw data (3)/Raw data/Original Flow files/CD62P/3/Specimen_001_CRP  025mgml_002.fcs
- Raw data (3)/Raw data/Original Flow files/CD62P/3/Specimen_001_CRP  05mgml_003.fcs
- Raw data (3)/Raw data/Original Flow files/CD62P/3/Specimen_001_CRP  0mg ml_001.fcs
- Raw data (3)/Raw data/Original Flow files/CD62P/3/Specimen_001_CRP  1mgml_004.fcs
- Raw data (3)/Raw data/Original Flow files/CD62P/3/Specimen_001_Resting  025mgml_003.fcs
- Raw data (3)/Raw data/Original Flow files/CD62P/3/Specimen_001_Resting  05mgml_002.fcs
- Raw data (3)/Raw data/Original Flow files/CD62P/3/Specimen_001_Resting  0mgml_001.fcs
- Raw data (3)/Raw data/Original Flow files/CD62P/3/Specimen_001_Resting  1mg ml_004.fcs
- Raw data (3)/Raw data/Original Flow files/CD62P/3/Specimen_001_Thr  025mgml_002.fcs
- Raw data (3)/Raw data/Original Flow files/CD62P/3/Specimen_001_Thr  05mgml_003.fcs
- Raw data (3)/Raw data/Original Flow files/CD62P/3/Specimen_001_Thr  0mgml_001.fcs
- Raw data (3)/Raw data/Original Flow files/CD62P/3/Specimen_001_Thr  1mgml_004.fcs
- Raw data (3)/Raw data/Original Flow files/GPVI/
- Raw data (3)/Raw data/Original Flow files/GPVI/1/
- Raw data (3)/Raw data/Original Flow files/GPVI/1/Specimen_001_210205  025mgml_002.fcs
- Raw data (3)/Raw data/Original Flow files/GPVI/1/Specimen_001_210205  05mgml_003.fcs
- Raw data (3)/Raw data/Original Flow files/GPVI/1/Specimen_001_210205  0mgml_001.fcs
- Raw data (3)/Raw data/Original Flow files/GPVI/1/Specimen_001_210205  1mgml_004.fcs
- Raw data (3)/Raw data/Original Flow files/GPVI/2/
- Raw data (3)/Raw data/Original Flow files/GPVI/2/Specimen_001_210303 025mgml_002.fcs
- Raw data (3)/Raw data/Original Flow files/GPVI/2/Specimen_001_210303 05mgml_003.fcs
- Raw data (3)/Raw data/Original Flow files/GPVI/2/Specimen_001_210303 0mgml_001.fcs
- Raw data (3)/Raw data/Original Flow files/GPVI/2/Specimen_001_210303 1mgml_004.fcs
- Raw data (3)/Raw data/Original Flow files/GPVI/3/
- Raw data (3)/Raw data/Original Flow files/GPVI/3/Specimen_001_210308 025mg ml_002.fcs
- Raw data (3)/Raw data/Original Flow files/GPVI/3/Specimen_001_210308 05mg ml_003.fcs
- Raw data (3)/Raw data/Original Flow files/GPVI/3/Specimen_001_210308 0mg ml_001.fcs
- Raw data (3)/Raw data/Original Flow files/GPVI/3/Specimen_001_210308 1mg ml_004.fcs
- Raw data (3)/Raw data/Original Flow files/GPVI/4/
- Raw data (3)/Raw data/Original Flow files/GPVI/4/Specimen_001_210309 025mg ml_002.fcs
- Raw data (3)/Raw data/Original Flow files/GPVI/4/Specimen_001_210309 05mg ml_003.fcs
- Raw data (3)/Raw data/Original Flow files/GPVI/4/Specimen_001_210309 0mg ml_001.fcs
- Raw data (3)/Raw data/Original Flow files/GPVI/4/Specimen_001_210309 1mg ml_004.fcs
- Raw data (3)/Raw data/Original Flow files/GPVI/5/
- Raw data (3)/Raw data/Original Flow files/GPVI/5/Specimen_001_210311 025 mgml_002.fcs
- Raw data (3)/Raw data/Original Flow files/GPVI/5/Specimen_001_210311 05 mgml_003.fcs
- Raw data (3)/Raw data/Original Flow files/GPVI/5/Specimen_001_210311 0mg ml_001.fcs
- Raw data (3)/Raw data/Original Flow files/GPVI/5/Specimen_001_210311 1mgml_004.fcs
- Raw data (3)/Raw data/Original Flow files/GPVI/6/
- Raw data (3)/Raw data/Original Flow files/GPVI/6/Specimen_001_210415  025mgml_002.fcs
- Raw data (3)/Raw data/Original Flow files/GPVI/6/Specimen_001_210415  05mgml_003.fcs
- Raw data (3)/Raw data/Original Flow files/GPVI/6/Specimen_001_210415 0mgml_001.fcs
- Raw data (3)/Raw data/Original Flow files/GPVI/6/Specimen_001_210415 1mgml_004.fcs
- Raw data (3)/Raw data/Original Flow files/ROS/
- Raw data (3)/Raw data/Original Flow files/ROS/1/
- Raw data (3)/Raw data/Original Flow files/ROS/1/Specimen_001_CRP  1mg ml_004.fcs
- Raw data (3)/Raw data/Original Flow files/ROS/1/Specimen_001_CRP 025mg ml_002.fcs
- Raw data (3)/Raw data/Original Flow files/ROS/1/Specimen_001_CRP 05mg ml_003.fcs
- Raw data (3)/Raw data/Original Flow files/ROS/1/Specimen_001_CRP 0mg ml_001.fcs
- Raw data (3)/Raw data/Original Flow files/ROS/1/Specimen_001_Resting 025mg ml_002.fcs
- Raw data (3)/Raw data/Original Flow files/ROS/1/Specimen_001_Resting 05mg ml_003.fcs
- Raw data (3)/Raw data/Original Flow files/ROS/1/Specimen_001_Resting 0mg ml_001.fcs
- Raw data (3)/Raw data/Original Flow files/ROS/1/Specimen_001_Resting 1 mg ml_004.fcs
- Raw data (3)/Raw data/Original Flow files/ROS/1/Specimen_001_Thr  025mg ml_002.fcs
- Raw data (3)/Raw data/Original Flow files/ROS/1/Specimen_001_Thr  05mg ml_003.fcs
- Raw data (3)/Raw data/Original Flow files/ROS/1/Specimen_001_Thr 0mg ml_001.fcs
- Raw data (3)/Raw data/Original Flow files/ROS/1/Specimen_001_Thr 1mg ml_004.fcs
- Raw data (3)/Raw data/Original Flow files/ROS/2/
- Raw data (3)/Raw data/Original Flow files/ROS/2/Specimen_001_CRP   1mg ml_004.fcs
- Raw data (3)/Raw data/Original Flow files/ROS/2/Specimen_001_CRP  025mg ml_002.fcs
- Raw data (3)/Raw data/Original Flow files/ROS/2/Specimen_001_CRP  05mg ml_003.fcs
- Raw data (3)/Raw data/Original Flow files/ROS/2/Specimen_001_CRP  0mg ml_001.fcs
- Raw data (3)/Raw data/Original Flow files/ROS/2/Specimen_001_Resting   025mg ml_002.fcs
- Raw data (3)/Raw data/Original Flow files/ROS/2/Specimen_001_Resting   05mg ml_003.fcs
- Raw data (3)/Raw data/Original Flow files/ROS/2/Specimen_001_Resting  0mg ml_001.fcs
- Raw data (3)/Raw data/Original Flow files/ROS/2/Specimen_001_Resting 1mg ml_004.fcs
- Raw data (3)/Raw data/Original Flow files/ROS/2/Specimen_001_Thr  0mg ml_002.fcs
- Raw data (3)/Raw data/Original Flow files/ROS/2/Specimen_001_Thr  1mg ml_001.fcs
- Raw data (3)/Raw data/Original Flow files/ROS/2/Specimen_001_Thr 025mgml_003.fcs
- Raw data (3)/Raw data/Original Flow files/ROS/2/Specimen_001_Thr 05mgml_004.fcs
- Raw data (3)/Raw data/Original Flow files/ROS/3/
- Raw data (3)/Raw data/Original Flow files/ROS/3/Specimen_001_CRP 025mgml_002.fcs
- Raw data (3)/Raw data/Original Flow files/ROS/3/Specimen_001_CRP 05mgml_003.fcs
- Raw data (3)/Raw data/Original Flow files/ROS/3/Specimen_001_CRP 0mgml_001.fcs
- Raw data (3)/Raw data/Original Flow files/ROS/3/Specimen_001_CRP 1mgml_004.fcs
- Raw data (3)/Raw data/Original Flow files/ROS/3/Specimen_001_Resting 025mgml_002.fcs
- Raw data (3)/Raw data/Original Flow files/ROS/3/Specimen_001_Resting 05mgml_003.fcs
- Raw data (3)/Raw data/Original Flow files/ROS/3/Specimen_001_Resting 0mgml_001.fcs
- Raw data (3)/Raw data/Original Flow files/ROS/3/Specimen_001_Resting 1mgml_004.fcs
- Raw data (3)/Raw data/Original Flow files/ROS/3/Specimen_001_Thr  025mgml_002.fcs
- Raw data (3)/Raw data/Original Flow files/ROS/3/Specimen_001_Thr  1mgml_004.fcs
- Raw data (3)/Raw data/Original Flow files/ROS/3/Specimen_001_Thr 05 mgml_003.fcs
- Raw data (3)/Raw data/Original Flow files/ROS/3/Specimen_001_Thr 0mgml_001.fcs
- Raw data (3)/Raw data/Original gel images.jpg
- Raw data (3)/Raw data/Platelet spreading original images/
- Raw data (3)/Raw data/Platelet spreading original images/COLL 0.25.tif
- Raw data (3)/Raw data/Platelet spreading original images/COLL 0.5.tif
- Raw data (3)/Raw data/Platelet spreading original images/COLL 0.tif
- Raw data (3)/Raw data/Platelet spreading original images/COLL 1.tif
- Raw data (3)/Raw data/Platelet spreading original images/FNG 0.25.tif
- Raw data (3)/Raw data/Platelet spreading original images/FNG 0.5.tif
- Raw data (3)/Raw data/Platelet spreading original images/FNG 0.tif
- Raw data (3)/Raw data/Platelet spreading original images/FNG 1.tif
- Raw data (3)/Raw data/Raw data.xlsx
