# Supplementary material for: Matrine Impairs Platelet Function and Thrombosis and Inhibits ROS Production
Source: Front Pharmacol. 2021 Jul 22;12:717725. doi: 10.3389/fphar.2021.717725 (PMC8339414; doi:10.3389/fphar.2021.717725)
Supplement: Supplementary file 1 [file DataSheet1.ZIP › Raw data (3)/Raw data/Raw data.xlsx]

## Sheet: Sheet1
Figure 1
(A)
	Aggregation	0	0.25	0.5	1
		75	60	29	2
		73	53	26	1
		65	46	19	2
	ATP	0	0.25	0.5	1
		100	28.8	4.6	0
		100	14.1	0	0
		100	5.26	0	0
(B)	Aggregation	0	0.25	0.5	1
		72	68	34	19
		70	69	49	14
		81	78	61	21
	ATP	0	0.25	0.5	1
		100	32	8.96	6.4
		100	58.52	43.89	7.98
		100	81.53	13.15	0
(C)		0						0.25						0.5						1
	Resting	0.9	0.5	1.2	1.1	1.2	1.3	1.7	0.8	1.2	1	0.7	1.4	2.1	2	1.7	0.8	1.7	1.5	2.8	2.4	1	0.8	2.5	0.5
	CRP	29.4	29.6	8	4.8	6.9	7.8	29	33.5	16.8	5.3	15.2	8.9	27.1	33.2	8.8	4.6	20.4	7.3	15.2	21.3	6
	Thrombin	5.2	10.9	9.9				6.4	12.3	9.9				5.4	13.7	9.6				3.2	7.5	7.6
Figure 2
	(A)	0	0.25	0.5	1
		1124	794	621	396
		1659	1412	1145	946
		5837	5912	4543	4465
		4392	3672	5791	5421
		2145	2595	1714	776
		1706	1491	1140	597
		1744	1017	1225	1354
	(B)	0	0.25	0.5	1
		5210	5314	5548	4500
		5061	5715	5656	4951
		4691	4683	4777	4134
		9393	9693	8980	8317
		3429	3254	3438	3617
		3861	3888	3945	3661
		4975	5085	5444	6078
	©	0	0.25	0.5	1
		327	233	360	343
		226	232	257	177
		246	396	295	346
		482	361	389	381
		582	487	364	360
		386	463	420	472
Figure 3
(A)	Fibrinogen	0	0.25	0.5	1
		16.2	10.9	8.6	5.6
		14	11.6	6.7	5
		12.4	9.1	7.2	4.1
	Collagen	0	0.25	0.5	1
		12.1	10.3	8.8	6.5
		12.9	9.5	7.2	5.2
		11.5	10.6	7.9	5.9
(B)		0			0.25			0.5			1
	0	100	100	100	100	100	100	100	100	100	100	100	100
	60	18.5	14.6	17.9	14.1	16.9	18.2	43.8321	45.9	47.1	51.8119	55.6	58.1
	120	7.8	9	8.2	6.7	9.5	8.7	38.9031	32.6	35.6	45.1471	41.6	50.9
(C)	Resting	0	0.25	0.5	1
	0.276667	1.32798	1.0109	0.603203	0.62104
	0.1	1.45	0.9	0.52	0.51
	0.2	1.25	0.85	0.64	0.59
Figure 4
(A)		Vehicle	Matrine
		639	665
		625	628
		692	615
		587	679
		806	649
		586	637
(B)		Vehicle	Matrine
		204	484
		99	342
		425	900
		510	900
		117	900
		89	531
		104	900
		149	900
		129	713
(C)		Vehicle	Matrine
		27	39.02
		16.37	40
		18.24	36.52
		27.2	40
(D)		0							0.25							0.5							1
	1	11.5	8.98	9.65	7.74	10.91	10.57		7.58	3.77	3.77	7.97	8.3			4.63		6.41	7.07	3.95			4.85	3.52		7.25	4.86	3.66
	3	22.45	25.92	19.59	30.21	31.55	27.41		16.08	8.2	5.74	19.11	9.85	6.18		16.87	5.9	14.03	12.37	10.05			14.21	11.64	9.97	11.97	7.99	9.9
	5	32.51	40.59	31.26	24.24	32.13	31.55		24.48	8.36	5.07	29.95	5.38	10.99		22.38	6.1	18.76	18.36	14.23			25.15	15.77	6.31	7.3	7.16	12.89
Figure 5
(A)		Vehicle	Matrine
		5.2	4
		7	3.5
		5	2
		6	3
		6	2
(B)		Vehicle	Matrine
		20.7	7.2
		13.1	4.7
		13.2	9.9
		11	4.7
		15	7.4
(C)		Vehicle	Matrine
		120.4	133.6
		100.1	96.3
		170	106.5
		153.7	145.3
(D)		Vehicle	Matrine
		137	101.8
		114.3	120.2
		118.2	102.4
		110.5	101.1
			113.6
Figure 6
(A)		0			0.25			0.5			1
	Resting	164	171	173	196	155	157	186	160	171	166	150	136
	CRP	401	679	474	251	367	271	223	230	213	188	197	162
	Thrombin	731	658	394	509	670	235	355	287	210	253	185	183
(B)		Resting			0			0.25			0.5			1
	ERK1/2	0.56267	0.42	0.51	1.11388	1.35	1.28	1.04699	0.95	0.91	0.742522	0.7	0.65	0.597285	0.52	0.43
	p38	0.450549	0.4	0.43	0.832702	0.91	0.86	0.750147	0.61	0.68	0.478155	0.51	0.43	0.298031	0.25	0.21
	AKT (T308)	0.418721	0.32	0.38	1.02202	1.15	1.09	0.888795	0.92	0.82	0.632263	0.68	0.56	0.490221	0.43	0.38
	AKT (S473)	0.092169	0.1	0.13	0.729318	0.79	0.82	0.601775	0.58	0.52	0.377988	0.42	0.32	0.343029	0.28	0.39
(C)		Resting			0			0.25			0.5			1
	ERK1/2	0.63125	0.53	0.57	0.88684	0.92	0.95	0.939372	0.97	0.89	0.813654	0.75	0.83	0.632448	0.51	0.57
	p38	0.207938	0.39	0.28	0.904741	0.95	0.97	0.873837	0.94	0.96	0.371101	0.45	0.47	0.298031	0.21	0.3
	AKT (T308)	0.532405	0.61	0.57	1.15911	1.25	1.1	0.851996	0.89	0.79	0.542901	0.51	0.58	0.42233	0.35	0.39
	AKT (S473)	0.30359	0.35	0.27	0.980835	0.91	0.92	0.791171	0.85	0.87	0.566679	0.6	0.52	0.445876	0.4	0.37
